# Supplementary material for: Racial and Ethnic Disparities in Clinical Trial Enrollment Among Women With Gynecologic Cancer
Source: PubMed Central journal article supplement (PMC10704282; doi:10.1001/jamanetworkopen.2023.46494), 2023-12-07
Supplement: jamanetwopen-e2346494-s002.pdf [file jamanetwopen-e2346494-s002.pdf]

## Data Sharing Statement

Khadraoui. Racial and Ethnic Disparities in Clinical Trial Enrollment Among Women With Gynecologic Cancer. *JAMA Netw Open*. Published December 07, 2023.

doi:10.1001/jamanetworkopen.2023.46494

### Data

**Data available:** No

### Additional Information

**Explanation for why data not available:** The data for this study were acquired by application to the restricted access National Cancer Database and the data use agreement does not allow data sharing
